# Supplementary material
Source: Springer Nature journal article supplement (https://www.springermedizin.de/resource/supplementary/12885_2013_4762_MOESM1_ESM.pdf/9467178)
Supplement: MOESM1 [file 9467178]

Identification

Records identified through HIV guidelines website  
(n = 121)

Additional records identified through PubMed and Web of Science (n = 1171)

Screening

Records after duplicates removed  
(n = 1285)

Records screened  
(n = 1285)

Records excluded  
(n = 909)

Eligibility

Full-text articles assessed for eligibility  
(n = 376)

Full-text articles excluded,  
255 – Not regional/national guidelines  
63 – Not guidelines for screening  
28 – not in English

Included

Studies included in qualitative synthesis  
(n = 30)

Studies included in quantitative synthesis (meta-analysis)  
(n = 2)
